# Supplementary material
Source: PubMed Central journal article supplement (PMC2556298)
Supplement: NIHMS60780-supplement-si20050722_110.pdf [file NIHMS60780-supplement-si20050722_110.pdf]

# Supplementary Materials

## **Crystal Structure of a Luteoviral RNA Pseudoknot and Model for a Minimal Ribosomal Frameshifting Motif**

**Pradeep S. Pallan,<sup>§</sup> William S. Marshall,<sup>||</sup> Joel Harp,<sup>§</sup> Frederic C. Jewett III,<sup>⊥</sup> Zdzislaw Wawrzak,<sup>#</sup> Bernard A. Brown II,<sup>⊥</sup> Alexander Rich,<sup>∇</sup> and Martin Egli<sup>§,\*</sup>**

*Department of Biochemistry, Vanderbilt University, School of Medicine, Nashville, Tennessee 37232, Dharmacon Inc., Lafayette, Colorado 80026, DND-CAT, Department of Chemistry, Wake Forest University, Winston-Salem, North Carolina 27109, Synchrotron Research Center, Sector 5, Advanced Photon Source, Argonne National Laboratory, Argonne, Illinois 60439, and Department of Biology, Massachusetts Institute of Technology, Cambridge, Massachusetts 02139*

<sup>§</sup> Vanderbilt University.

<sup>||</sup> Dharmacon Inc.

<sup>#</sup> Wake Forest University

<sup>⊥</sup> Argonne National Laboratory

\* Corresponding author: martin.egli@vanderbilt.edu

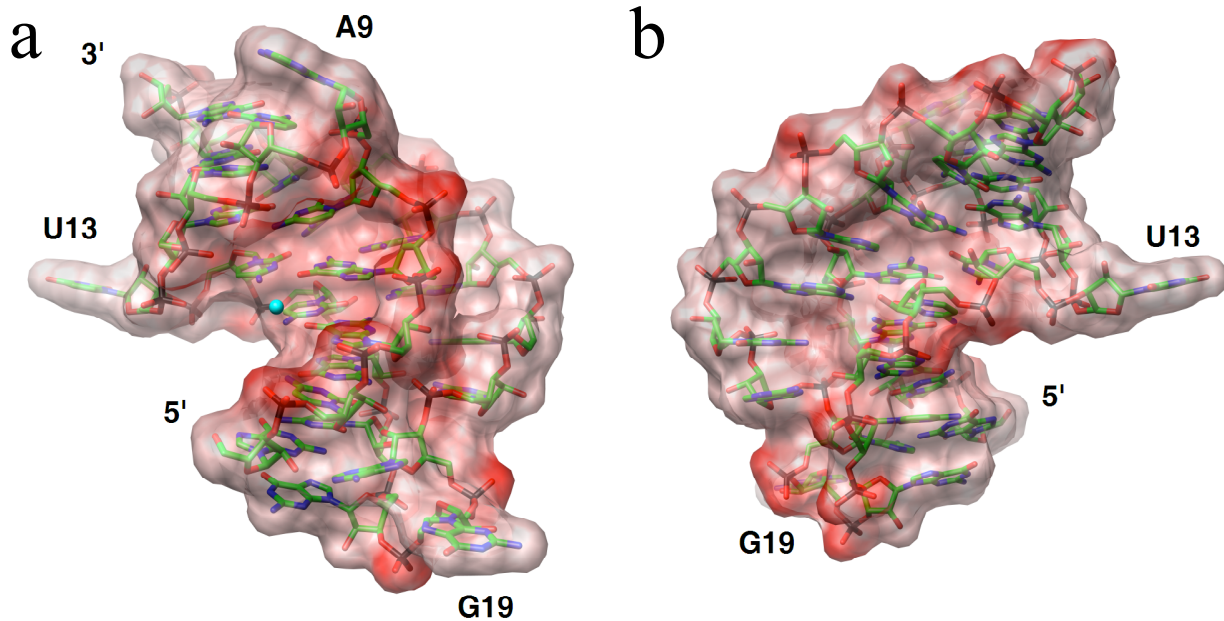

**Suppl. Figure 1.**

Electrostatic surface potential of the BWYV pseudoknot RNA. *a*, the BWYV pseudoknot viewed into the major grooves of stem 1 and stem 2 with loop 2 on the right. *b*, rotated by 180° around the vertical relative to panel *a*, and viewed into the continuous minor groove formed by stems 1 and 2. The potentials were calculated with the program GRASP and are displayed in the energy range between -38 to +38  $k_B T/e$ . Single negative charges were used for all nucleotides with the exception of C8 that was assumed to be neutral. Red regions are negatively polarized and a  $Mg^{2+}$  ion coordinated near the interface between stem 1 and stem 2 is depicted as a small cyan sphere.
